# Supplementary material for: Comparison Study of Four Extraction Methods Combined with PCR and LAMP for Feline Tritrichomonas foetus Detection in Fecal Samples
Source: MDPI journal article supplement (doi:10.3390/pathogens11050604), 2022-05-22
Supplement: s1 [file s1]

| Protozoan parasite             | Commercial kit                                                                  | Molecular method | Positive results | References |
|--------------------------------|---------------------------------------------------------------------------------|------------------|------------------|------------|
| <i>Cryptosporidium</i> spp     | QIAamp DNA stool mini kit (Qiagen Hilden, Germany)                              | Nested PCR       | 93.8% (n=32)     | [18]       |
| <i>Giardia duodenalis</i>      | Wizard magnetic DNA purification system (Promega Corporation, Madison, WI, USA) | Real-time PCR    | 100% (n=47)      |            |
| <i>Entamoeba</i> spp           | PowerFecal DNA isolation kit (MoBio, Carlsbad, CA, USA)                         | Real-time PCR    | 93.8% (n=13)     |            |
| <i>Cryptosporidium hominis</i> | ZR Fecal DNA MiniPrep™ Kit (Zymo Research, Irvine, CA)                          | Real-time PCR    | 100% (n=12)      | [19]       |
| <i>Cryptosporidium parvum</i>  | ZR Fecal DNA MiniPrep™ Kit (Zymo Research, Irvine, CA)                          | Real-time PCR    | 100% (n=11)      |            |
| <i>Cryptosporidium felis</i>   | ZR Fecal DNA MiniPrep™ Kit (Zymo Research, Irvine, CA)                          | Real-time PCR    | 100% (n=3)       |            |
| <i>Blastocystis</i> sp.        | ZR Fecal DNA MiniPrep™ Kit (Zymo Research, Irvine, CA)                          | PCR              | 94% (n=50)       | [20]       |
| <i>Enterocytozoon bienuesi</i> | QIAamp stool mini kit (Qiagen Hilden, Germany)                                  | PCR              | 100% (n=290)     | [21]       |
| <i>Toxoplasma gondi</i>        | RTA DNA Isolation Kit from stool (Istambul, Turkey)                             | LAMP             | 100% (n=41)      | [22]       |
